# Supplementary material for: Antimicrobial and scavenging potential of green synthesized silver/manganese bimetallic nanoparticles using Euphorbia cactus extract
Source: PeerJ. 2025 Oct 27;13:e20244. doi: 10.7717/peerj.20244 (PMC12574592; doi:10.7717/peerj.20244)
Supplement: Supplemental Information 1 [file peerj-13-20244-s001.xlsx]

## Sheet: Table 1
Microbial strains		Concentration (µg/mL)	Zone of inhibition (mm)
			EC-extract	EC-Ag/MnNPs	Standard
Gram +ve	S. aureus	25	6.32	12.47	14.46
		50	12.03	18.52	17.27
		100	16.08	22.13	20.16
	S. pneumoniae	25	2.56	2.12	10.36
		50	5.21	3.46	15.08
		100	7.26	5.48	18.23
	MRSA	25	15.37	16.7	15.89
		50	17.49	18.46	18.62
		100	21.14	25.36	22.12
Gram -ve	E. cloacae	25	2.67	14.89	14.21
		50	6.21	17.63	16.92
		100	8.32	24.71	19.26
	E.coli	25	10.25	18.34	12.47
		50	15.79	25.68	17.03
		100	18.36	38.15	20.17
	S.typhi	25	9.58	16.92	12.14
		50	13.45	23.75	15.69
		100	17.42	36.81	20.23
Fungi	C. glabrata	25	16.47	18.36	11.78
		50	19.96	26.63	14.82
		100	25.14	35.1	19.17
	C. parapsilosis	25	15.84	17.21	12.37
		50	20.15	25.28	16.17
		100	27.73	33.82	20.21
