# Supplementary material for: Antimicrobial and scavenging potential of green synthesized silver/manganese bimetallic nanoparticles using Euphorbia cactus extract
Source: PeerJ. 2025 Oct 27;13:e20244. doi: 10.7717/peerj.20244 (PMC12574592; doi:10.7717/peerj.20244)
Supplement: Supplemental Information 2 [file peerj-13-20244-s002.xlsx]

## Sheet: Table 1
Gram +ive	Microbial strains	Zone of inhibition (mm)
		EC-extract	EC-Ag/MnNPs	Standard
	S. aureus	15.98	22.13	19.76
		16.08	21.96	20.16
		16.18	22.3	20.56
		16.08 ± 0.10	22.13± 0.17	20.16± 0.40
	S. pneumoniae	7.26	4.84	17.86
		6.35	5.48	18.6
		8.17	6.12	18.23
		7.26± 0.91	5.48± 0.64	18.23± 0.37
	MRSA	21.14	25.27	22.12
		21.1	25.36	21.79
		21.18	25.45	22.45
		21.14± 0.04	25.36± 0.09	22.12± 0.32
Gram -ive	E. cloacae	7.21	24.71	18.75
		9.16	24.75	19.77
		8.32	24.67	19.26
		8.32± 0.97	24.71± 0.04	19.26± 0.51
	E.coli	18.27	37.83	20.17
		18.45	38.15	19.82
		18.36	38.47	20.52
		18.36± 0.09	38.15± 0.32	20.17± 0.35
	S.typhi	17.42	36.81	19.85
		17.21	36.3	20.61
		17.63	37.32	20.23
		17.42± 0.21	36.81± 0.51	20.23± 0.38
	C. glabrata	24.74	35.1	18.67
		25.14	34.71	19.17
		25.54	35.49	19.67
		25.14± 0.40	35.10± 0.39	19.17± 0.50
Fungi
	C. parapsilosis	27.73	32.85	19.27
		27.35	33.82	21.15
		28.11	34.79	20.21
		27.73± 0.38	33.82± 0.97	20.21± 0.94
