# Supplementary material for: Antimicrobial and scavenging potential of green synthesized silver/manganese bimetallic nanoparticles using Euphorbia cactus extract
Source: PeerJ. 2025 Oct 27;13:e20244. doi: 10.7717/peerj.20244 (PMC12574592; doi:10.7717/peerj.20244)
Supplement: Supplemental Information 3 [file peerj-13-20244-s003.xlsx]

## Sheet: Table 1
Samples	Inhibition (%)
	Concentration (µg/mL)
	20	40	60	80	IC50 value
EC-extract	21.34	36.74	58.14	75.12	58.12
	20.79	39.5	58.63	75.16
	21.83	38.12	59.12	75.08
	21.34±0.52	38.12±1.38	58.63±0.49	75.16±0.04
EC-Ag/MnNPs	28.32	47.35	75.13	95.72	42.89
	27.52	48.57	75.1	96.52
	29.12	47.96	75.16	96.12
	28.32±0.80	47.96±0.61	75.13±0.03	96.12±0.40
L-Ascorbic acid	25.45	41.1	68.81	87.34
	25.37	42.15	69.73	86.41	48.74
	25.53	43.2	69.27	88.27
	25.45±0.08	42.15±1.05	69.27±0.46	87.34±0.93
